# Supplementary material
Source: PubMed Central journal article supplement (PMC3200309)

Figure S1

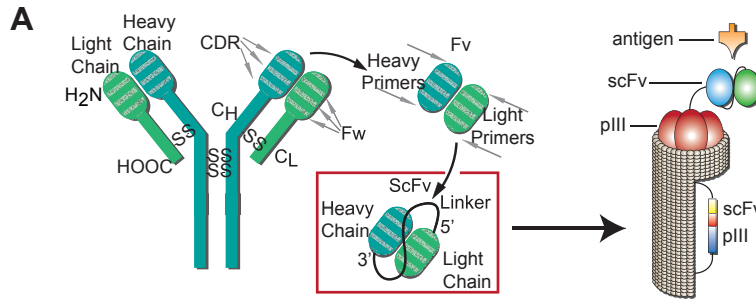

B

|         | 1                | 10    | 20     | 30    | 40  | 50    | 60       | 70     |             |     |           |
|---------|------------------|-------|--------|-------|-----|-------|----------|--------|-------------|-----|-----------|
| scFv12  | VAQAALTOPSSVSANP | EGAVK | ITCSGG | GSSSY | GWY | QOKSP | GSAPVTVI | YNDKRP | SDVPSRFSGSK | SGT | ATLTTITGV |
| scFv21  | VAQAALTOPSSVSANP | EGTVK | ITCSGG | GSSSY | GWY | QOKSP | GSAPVTVI | YNDKRP | SDVPSRFSGSK | SGT | ATLTTITGV |
| scFv28  | VAQAALTOPSSVSANL | GETVK | ITCSGG | GSSSY | GWY | QOKSP | GSAPVTVI | YNDKRP | SDVPSRFSGSK | SGT | ATLTTITGV |
| scFv49  | VAQAALTOPSSVSANP | GETVK | ITCSGG | GSSSY | GWY | QOKSP | GSAPVTVI | YNDKRP | SDVPSRFSGSK | SGT | ATLTTITGV |
| scFv136 | VAQAALTOPSSVSANP | GETVK | ITCSGG | GSSSY | GWY | QOKSP | GSAPVTVI | YNDKRP | SDVPSRFSGSK | SGT | ATLTTITGV |
| scFv43  | VAQAALTOPSSVSANP | GETVK | ITCSGG | GSSSY | GWY | QOKSP | GSAPVTVI | YNDKRP | SDVPSRFSGSK | SGT | ATLTTITGV |
| scFv48  | VAQAALTOPSSVSANP | GETVK | ITCSGG | GSSSY | GWY | QOKSP | GSAPVTVI | YNDKRP | SDVPSRFSGSK | SGT | ATLTTITGV |
| scFv13  | VAQAALTOPSSVSANL | GETVK | ITCSGG | GSSSY | GWY | QOKSP | GSAPVTVI | YNDKRP | SDVPSRFSGSK | SGT | ATLTTITGV |
| scFv104 | VAQAALTOPSSVSANL | GETVE | ITCSGG | GSSSY | GWY | QOKSP | GSAPVTVI | YNDKRP | SDVPSRFSGSK | SGT | ATLTTITGV |
| scFv45  | VAQAALTOPSSVSANP | GETVK | ITCSGG | GSSSY | GWY | QOKSP | GSAPVTVI | YNDKRP | SDVPSRFSGSK | SGT | ATLTTITGV |
| scFv57  | VAQAALTOPSSVSANP | GETVK | ITCSGG | GSSSY | GWY | QOKSP | GSAPVTVI | YNDKRP | SDVPSRFSGSK | SGT | ATLTTITGV |
| scFv67  | VAQAALTOPSSVSANP | GETVK | ITCSGG | GSSSY | GWY | QOKSP | GSAPVTVI | YNDKRP | SDVPSRFSGSK | SGT | ATLTTITGV |
| scFv106 | VAQAALTOPSSVSANP | GETVK | ITCSGG | GSSSY | GWY | QOKSP | GSAPVTVI | YNDKRP | SDVPSRFSGSK | SGT | ATLTTITGV |
| scFv64  | VAQAALTOPSSVSANP | CDPLK | ITCSGG | SGYGY | GWY | QOKSP | GSAPVTVI | YNDKRP | SDVPSRFSGSK | SGT | ATLTTITGV |
| scFv95  | VAQAALTOPSSVSANP | GETVE | ITCSGG | GSSSY | GWY | QOKSP | GSAPVTVI | YNDKRP | SDVPSRFSGSK | SGT | ATLTTITGV |
| scFv103 | VAQAALTOPSSVSANP | GETVE | ITCSGG | GSSSY | GWY | QOKSP | GSAPVTVI | YNDKRP | SDVPSRFSGSK | SGT | ATLTTITGV |
| scFv20  | VAQAALTOPSSVSANP | GETVE | ITCSGG | GSSSY | GWY | QOKSP | GSAPVTVI | YNDKRP | SDVPSRFSGSK | SGT | ATLTTITGV |
| scFv34  | VAQAALTOPSSVSANL | GETVE | ITCSGG | GSSSY | GWY | QOKSP | GSAPVTVI | YNDKRP | SDVPSRFSGSK | SGT | ATLTTITGV |
| scFv105 | VAQAALTOPSSVSANP | EGAVK | ITCSGG | GSSSY | GWY | QOKSP | GSAPVTVI | YNDKRP | SDVPSRFSGSK | SGT | ATLTTITGV |
| scFv102 | VAQAALTOPSSVSANP | GETVK | ITCSGG | GSSSY | GWY | QOKSP | GSAPVTVI | YNDKRP | SDVPSRFSGSK | SGT | ATLTTITGV |
| scFv33  | VAQAALTOPSSVSANP | GETVK | ITCSGG | SGYGY | GWY | QOKSP | GSAPVTVI | YNDKRP | SDVPSRFSGSK | SGT | ATLTTITGV |

  

|         | 80               | 90      | 100   | 110          | 120       | 130         | 140       | 150      |
|---------|------------------|---------|-------|--------------|-----------|-------------|-----------|----------|
| scFv12  | QABDEAVYFCGGYDSS | .GD..GT | FGAGT | TLTVLGGSSRSS | SGGSSGGGS | AVTLDSEGGGL | TPGGALSLV | CKASGFTF |
| scFv21  | QABDEAVYFCGGYDSS | .YV..CI | FGAGT | TLTVLGGSSRSS | SGGSSGGGS | AVTLDSEGGGL | TPGGALSLV | CKASGFTF |
| scFv28  | QABDEAVYFCGGYDSS | .YV..CI | FGAGT | TLTVLGGSSRSS | SGGSSGGGS | AVTLDSEGGGL | TPGGALSLV | CKASGFTF |
| scFv49  | QABDEAVYFCGGYDSS | .YV..CI | FGAGT | TLTVLGGSSRSS | SGGSSGGGS | AVTLDSEGGGL | TPGGALSLV | CKASGFTF |
| scFv136 | QABDEAVYFCGGYDSS | .YV..CI | FGAGT | TLTVLGGSSRSS | SGGSSGGGS | AVTLDSEGGGL | TPGGALSLV | CKASGFTF |
| scFv43  | QABDEAVYFCGGYDSS | .YV..CI | FGAGT | TLTVLGGSSRSS | SGGSSGGGS | AVTLDSEGGGL | TPGGALSLV | CKASGFTF |
| scFv48  | QABDEAVYFCGGYDSS | .YV..CI | FGAGT | TLTVLGGSSRSS | SGGSSGGGS | AVTLDSEGGGL | TPGGALSLV | CKASGFTF |
| scFv13  | QABDEAVYFCGGYDSS | .YV..CI | FGAGT | TLTVLGGSSRSS | SGGSSGGGS | AVTLDSEGGGL | TPGGALSLV | CKASGFTF |
| scFv104 | QABDEAVYFCGGYDSS | .YV..CI | FGAGT | TLTVLGGSSRSS | SGGSSGGGS | AVTLDSEGGGL | TPGGALSLV | CKASGFTF |
| scFv45  | QABDEAVYFCGGYDSS | .YV..CI | FGAGT | TLTVLGGSSRSS | SGGSSGGGS | AVTLDSEGGGL | TPGGALSLV | CKASGFTF |
| scFv57  | QABDEAVYFCGGYDSS | .YV..CI | FGAGT | TLTVLGGSSRSS | SGGSSGGGS | AVTLDSEGGGL | TPGGALSLV | CKASGFTF |
| scFv67  | QABDEAVYFCGGYDSS | .YV..CI | FGAGT | TLTVLGGSSRSS | SGGSSGGGS | AVTLDSEGGGL | TPGGALSLV | CKASGFTF |
| scFv106 | QABDEAVYFCGGYDSS | .YV..CI | FGAGT | TLTVLGGSSRSS | SGGSSGGGS | AVTLDSEGGGL | TPGGALSLV | CKASGFTF |
| scFv64  | QABDEAVYFCGGYDSS | .YV..CI | FGAGT | TLTVLGGSSRSS | SGGSSGGGS | AVTLDSEGGGL | TPGGALSLV | CKASGFTF |
| scFv95  | QABDEAVYFCGGYDSS | .YV..CI | FGAGT | TLTVLGGSSRSS | SGGSSGGGS | AVTLDSEGGGL | TPGGALSLV | CKASGFTF |
| scFv103 | QABDEAVYFCGGYDSS | .YV..CI | FGAGT | TLTVLGGSSRSS | SGGSSGGGS | AVTLDSEGGGL | TPGGALSLV | CKASGFTF |
| scFv20  | QABDEAVYFCGGYDSS | .YV..CI | FGAGT | TLTVLGGSSRSS | SGGSSGGGS | AVTLDSEGGGL | TPGGALSLV | CKASGFTF |
| scFv34  | QABDEAVYFCGGYDSS | .YV..CI | FGAGT | TLTVLGGSSRSS | SGGSSGGGS | AVTLDSEGGGL | TPGGALSLV | CKASGFTF |
| scFv105 | QABDEAVYFCGGYDSS | .YV..CI | FGAGT | TLTVLGGSSRSS | SGGSSGGGS | AVTLDSEGGGL | TPGGALSLV | CKASGFTF |
| scFv102 | QABDEAVYFCGGYDSS | .YV..CI | FGAGT | TLTVLGGSSRSS | SGGSSGGGS | AVTLDSEGGGL | TPGGALSLV | CKASGFTF |
| scFv33  | QABDEAVYFCGGYDSS | .YV..CI | FGAGT | TLTVLGGSSRSS | SGGSSGGGS | AVTLDSEGGGL | TPGGALSLV | CKASGFTF |

  

|         | 160       | 170       | 180   | 190   | 200   | 210 | 220      | 230       |          |       |    |   |        |          |
|---------|-----------|-----------|-------|-------|-------|-----|----------|-----------|----------|-------|----|---|--------|----------|
| scFv12  | SGYNDMGWV | ROAPGKGLE | WVGGT | SGSGR | RYTEY | GA  | AVKGRATI | SRDNGOSTV | RLQNLNLR | RAEDT | GT | Y | CAKAAV | SDYCG... |
| scFv21  | SSYNDMGWV | ROAPGKGLE | WVGGT | SGSGR | RYTEY | GA  | AVKGRATI | SRDNGOSTV | RLQNLNLR | RAEDT | GT | Y | CAKAAV | SDYCG... |
| scFv28  | SSYNDMGWV | ROAPGKGLE | WVGGT | SGSGR | RYTEY | GA  | AVKGRATI | SRDNGOSTV | RLQNLNLR | RAEDT | GT | Y | CAKAAV | SDYCG... |
| scFv49  | SSYNDMGWV | ROAPGKGLE | WVGGT | SGSGR | RYTEY | GA  | AVKGRATI | SRDNGOSTV | RLQNLNLR | RAEDT | GT | Y | CAKAAV | SDYCG... |
| scFv136 | SSYNDMGWV | ROAPGKGLE | WVGGT | SGSGR | RYTEY | GA  | AVKGRATI | SRDNGOSTV | RLQNLNLR | RAEDT | GT | Y | CAKAAV | SDYCG... |
| scFv43  | SSYNDMGWV | ROAPGKGLE | WVGGT | SGSGR | RYTEY | GA  | AVKGRATI | SRDNGOSTV | RLQNLNLR | RAEDT | GT | Y | CAKAAV | SDYCG... |
| scFv48  | SSYNDMGWV | ROAPGKGLE | WVGGT | SGSGR | RYTEY | GA  | AVKGRATI | SRDNGOSTV | RLQNLNLR | RAEDT | GT | Y | CAKAAV | SDYCG... |
| scFv13  | SSYNDMGWV | ROAPGKGLE | WVGGT | SGSGR | RYTEY | GA  | AVKGRATI | SRDNGOSTV | RLQNLNLR | RAEDT | GT | Y | CAKAAV | SDYCG... |
| scFv104 | SSYNDMGWV | ROAPGKGLE | WVGGT | SGSGR | RYTEY | GA  | AVKGRATI | SRDNGOSTV | RLQNLNLR | RAEDT | GT | Y | CAKAAV | SDYCG... |
| scFv45  | SSYNDMGWV | ROAPGKGLE | WVGGT | SGSGR | RYTEY | GA  | AVKGRATI | SRDNGOSTV | RLQNLNLR | RAEDT | GT | Y | CAKAAV | SDYCG... |
| scFv57  | SSYNDMGWV | ROAPGKGLE | WVGGT | SGSGR | RYTEY | GA  | AVKGRATI | SRDNGOSTV | RLQNLNLR | RAEDT | GT | Y | CAKAAV | SDYCG... |
| scFv67  | SSYNDMGWV | ROAPGKGLE | WVGGT | SGSGR | RYTEY | GA  | AVKGRATI | SRDNGOSTV | RLQNLNLR | RAEDT | GT | Y | CAKAAV | SDYCG... |
| scFv106 | SSYNDMGWV | ROAPGKGLE | WVGGT | SGSGR | RYTEY | GA  | AVKGRATI | SRDNGOSTV | RLQNLNLR | RAEDT | GT | Y | CAKAAV | SDYCG... |
| scFv64  | SSYNDMGWV | ROAPGKGLE | WVGGT | SGSGR | RYTEY | GA  | AVKGRATI | SRDNGOSTV | RLQNLNLR | RAEDT | GT | Y | CAKAAV | SDYCG... |
| scFv95  | SSYNDMGWV | ROAPGKGLE | WVGGT | SGSGR | RYTEY | GA  | AVKGRATI | SRDNGOSTV | RLQNLNLR | RAEDT | GT | Y | CAKAAV | SDYCG... |
| scFv103 | SSYNDMGWV | ROAPGKGLE | WVGGT | SGSGR | RYTEY | GA  | AVKGRATI | SRDNGOSTV | RLQNLNLR | RAEDT | GT | Y | CAKAAV | SDYCG... |
| scFv20  | SSYNDMGWV | ROAPGKGLE | WVGGT | SGSGR | RYTEY | GA  | AVKGRATI | SRDNGOSTV | RLQNLNLR | RAEDT | GT | Y | CAKAAV | SDYCG... |
| scFv34  | SSYNDMGWV | ROAPGKGLE | WVGGT | SGSGR | RYTEY | GA  | AVKGRATI | SRDNGOSTV | RLQNLNLR | RAEDT | GT | Y | CAKAAV | SDYCG... |
| scFv105 | SSYNDMGWV | ROAPGKGLE | WVGGT | SGSGR | RYTEY | GA  | AVKGRATI | SRDNGOSTV | RLQNLNLR | RAEDT | GT | Y | CAKAAV | SDYCG... |
| scFv102 | SSYNDMGWV | ROAPGKGLE | WVGGT | SGSGR | RYTEY | GA  | AVKGRATI | SRDNGOSTV | RLQNLNLR | RAEDT | GT | Y | CAKAAV | SDYCG... |
| scFv33  | SSYNDMGWV | ROAPGKGLE | WVGGT | SGSGR | RYTEY | GA  | AVKGRATI | SRDNGOSTV | RLQNLNLR | RAEDT | GT | Y | CAKAAV | SDYCG... |

  

|         | 240      | 250 | 260     | 270  |          |          |           |
|---------|----------|-----|---------|------|----------|----------|-----------|
| scFv12  | .GGCAGD  | LD  | AWGHGTE | IVSS | TSGQAGQH | HHHHHGAY | PDVDPDYAS |
| scFv21  | .GSDAGD  | LD  | AWGHGTE | IVSS | TSGQAGQH | HHHHHGAY | PDVDPDYAS |
| scFv28  | .WNYAGT  | LD  | AWGHGTE | IVSS | TSGQAGQH | HHHHHGAY | PDVDPDYAS |
| scFv49  | .PGAAGT  | LD  | AWGHGTE | IVSS | TSGQAGQH | HHHHHGAY | PDVDPDYAS |
| scFv136 | .PGAAGT  | LD  | AWGHGTE | IVSS | TSGQAGQH | HHHHHGAY | PDVDPDYAS |
| scFv43  | .TFAFAG  | LD  | AWGHGTE | IVSS | TSGQAGQH | HHHHHGAY | PDVDPDYAS |
| scFv48  | .TFAFAG  | LD  | AWGHGTE | IVSS | TSGQAGQH | HHHHHGAY | PDVDPDYAS |
| scFv13  | .SAIAGD  | LD  | AWGHGTE | IVSS | TSGQAGQH | HHHHHGAY | PDVDPDYAS |
| scFv104 | .GNIAGS  | LD  | AWGHGTE | IVSS | TSGQAGQH | HHHHHGAY | PDVDPDYAS |
| scFv45  | ...TGNST | LD  | AWGHGTE | IVSS | TSGQAGQH | HHHHHGAY | PDVDPDYAS |
| scFv57  | ...TGNST | LD  | AWGHGTE | IVSS | TSGQAGQH | HHHHHGAY | PDVDPDYAS |
| scFv67  | ...TGNST | LD  | AWGHGTE | IVSS | TSGQAGQH | HHHHHGAY | PDVDPDYAS |
| scFv106 | ...TGNST | LD  | AWGHGTE | IVSS | TSGQAGQH | HHHHHGAY | PDVDPDYAS |
| scFv64  | ...NGNNT | LD  | AWGHGTE | IVSS | TSGQAGQH | HHHHHGAY | PDVDPDYAS |
| scFv95  | ...SGDIT | LD  | AWGHGTE | IVSS | TSGQAGQH | HHHHHGAY | PDVDPDYAS |
| scFv103 | ...SGDIT | LD  | AWGHGTE | IVSS | TSGQAGQH | HHHHHGAY | PDVDPDYAS |
| scFv20  | ...DVFAT | LD  | AWGHGTE | IVSS | TSGQAGQH | HHHHHGAY | PDVDPDYAS |
| scFv34  | ...IGAYC | LD  | AWGHGTE | IVSS | TSGQAGQH | HHHHHGAY | PDVDPDYAS |
| scFv105 | ...IGAYC | LD  | AWGHGTE | IVSS | TSGQAGQH | HHHHHGAY | PDVDPDYAS |
| scFv102 | ...NSAGT | LD  | AWGHGTE | IVSS | TSGQAGQH | HHHHHGAY | PDVDPDYAS |
| scFv33  | ...AGRIT | LD  | AWGHGTE | IVSS | TSGQAGQH | HHHHHGAY | PDVDPDYAS |

Figure S2

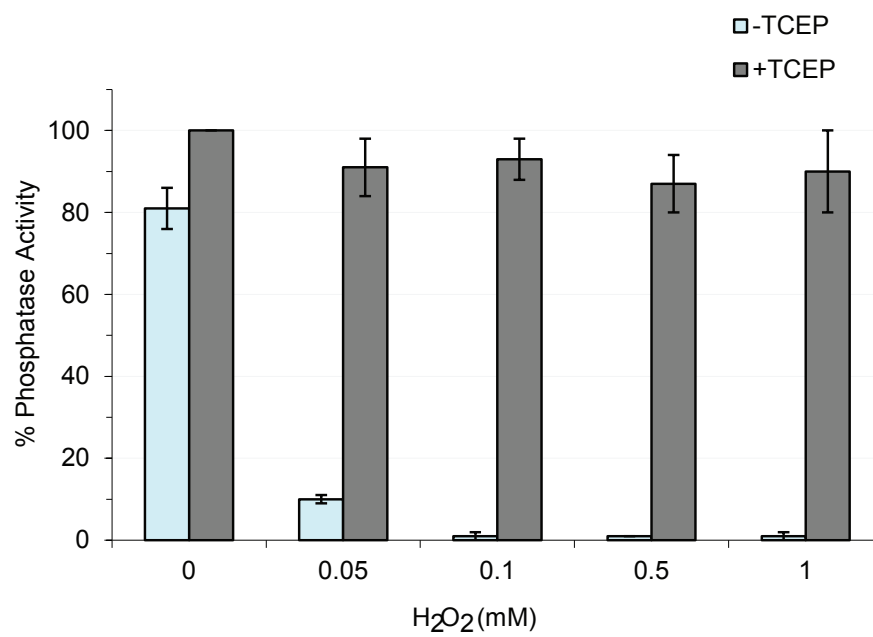

Figure S3

A

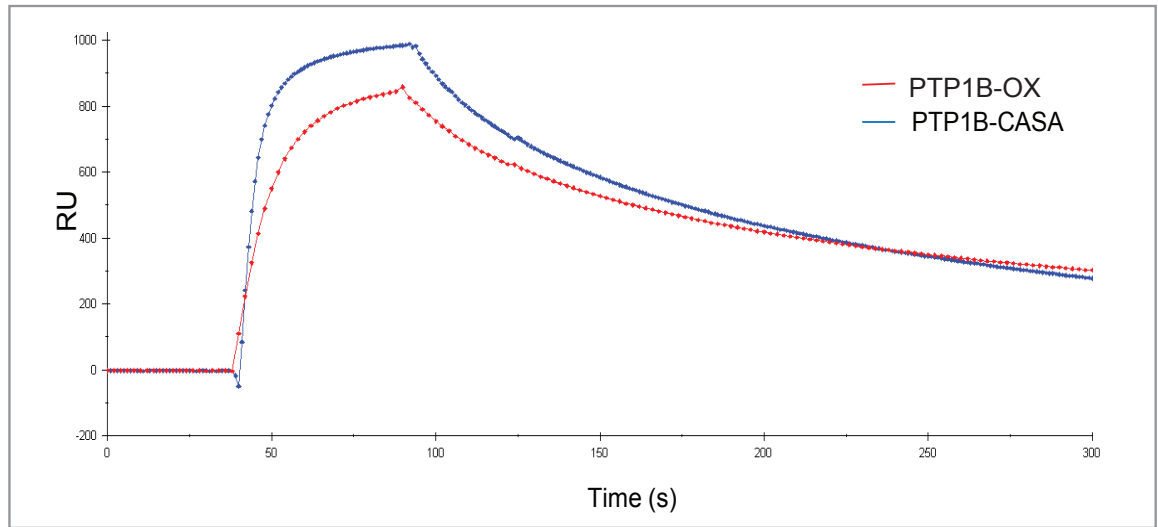

B

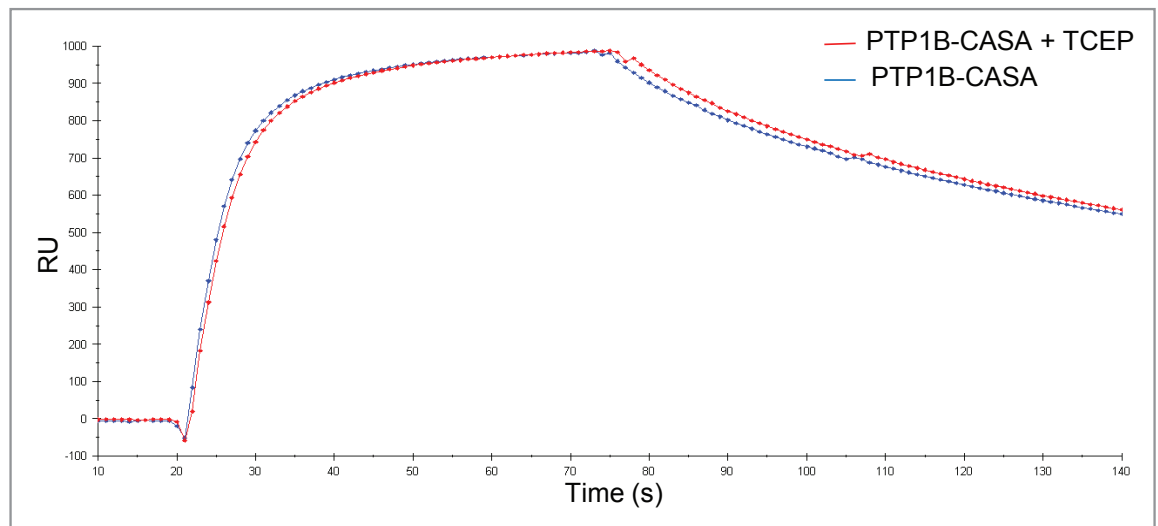

Figure S4

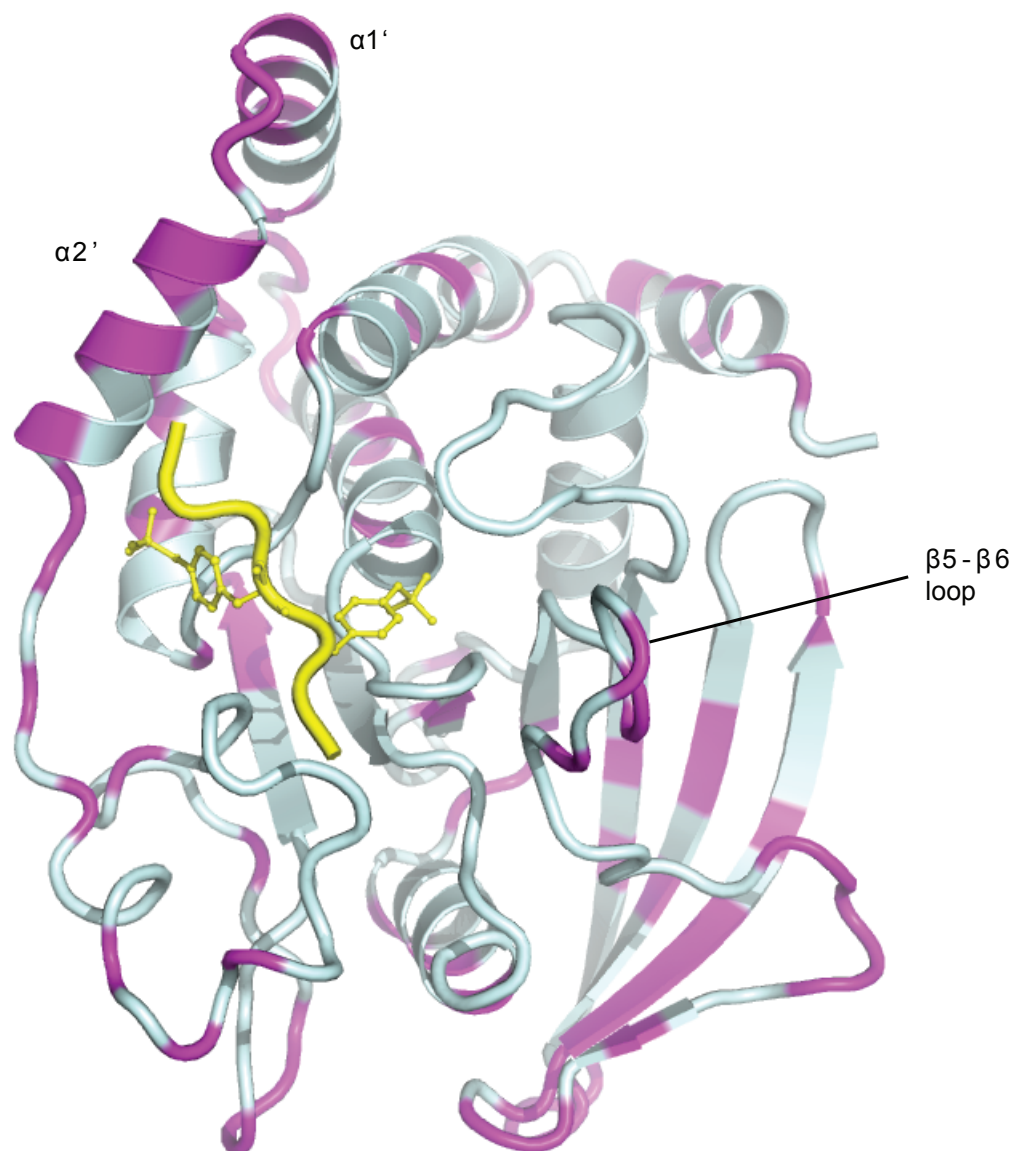



Figure S6

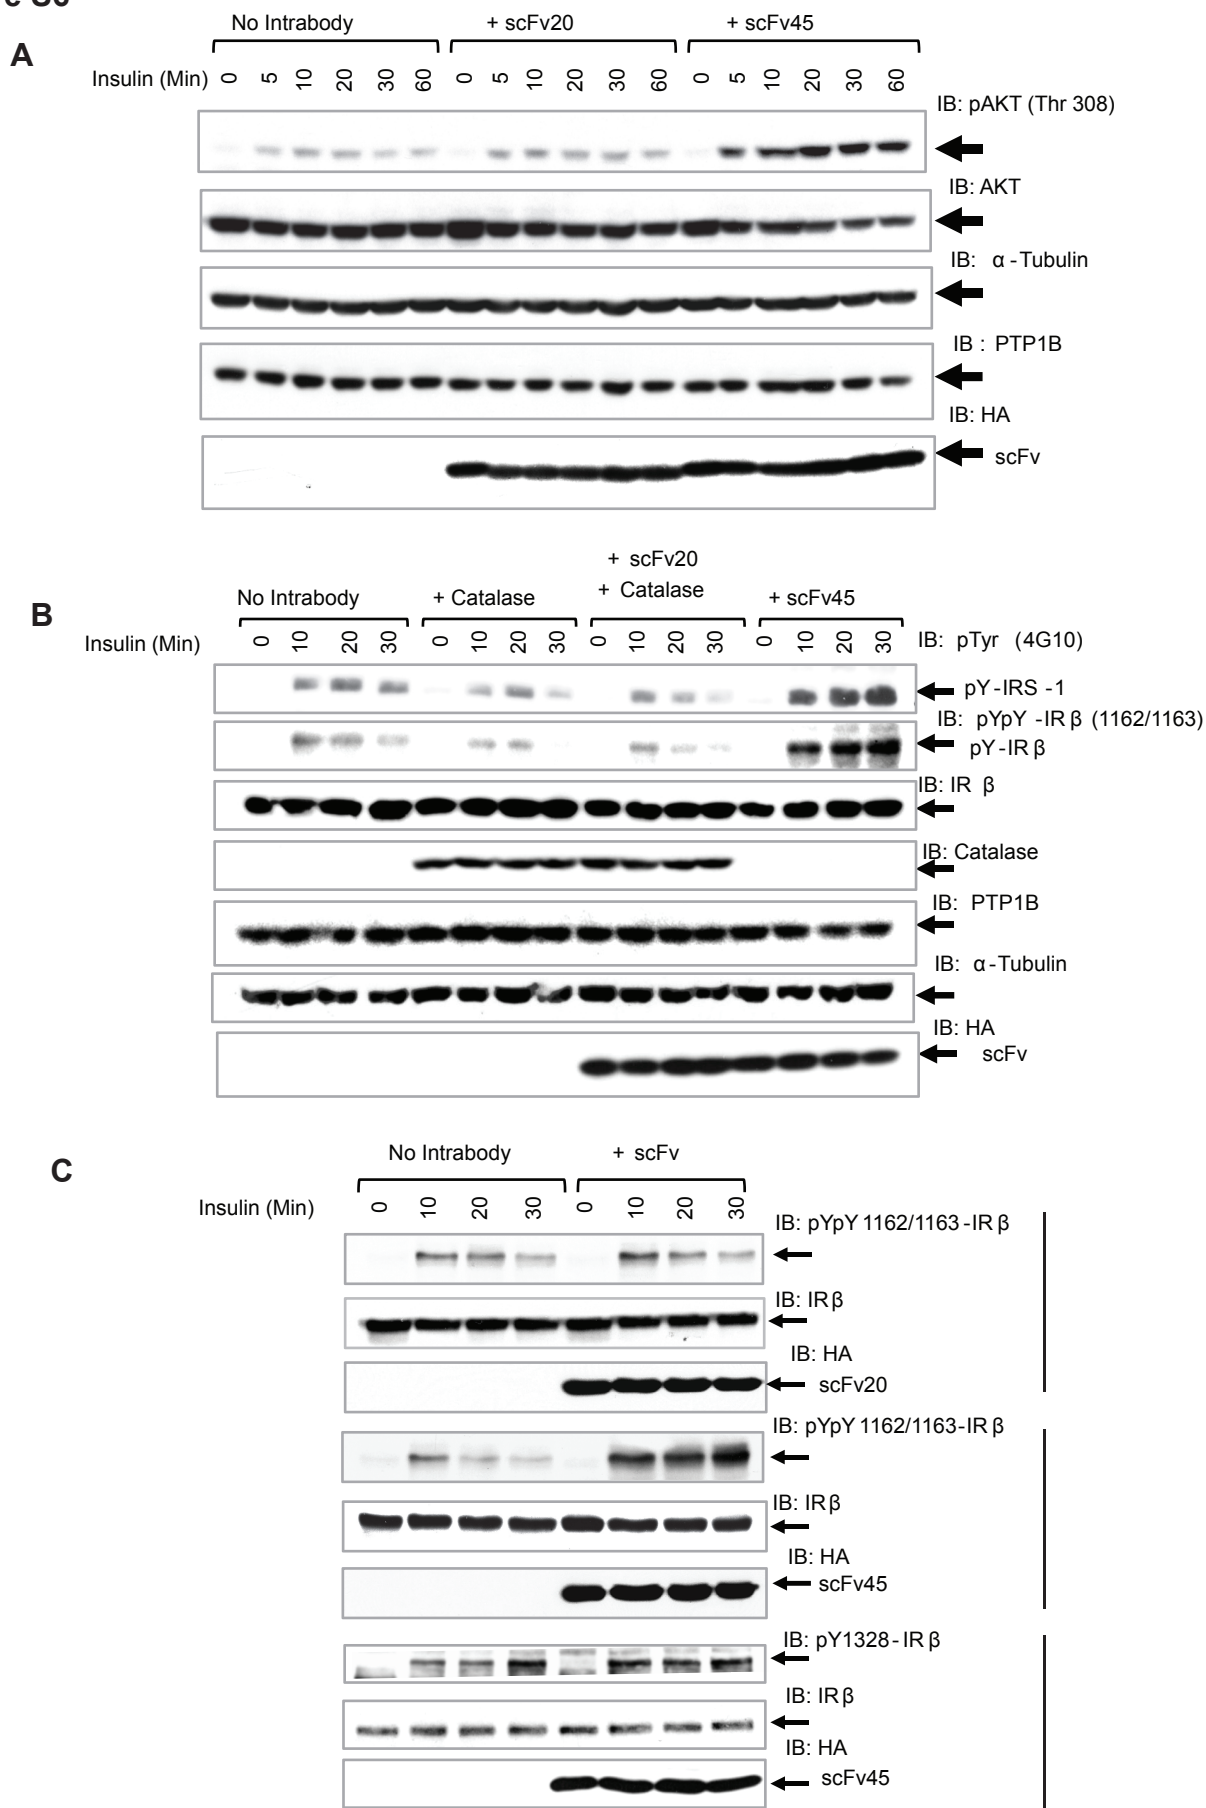

Figure S7

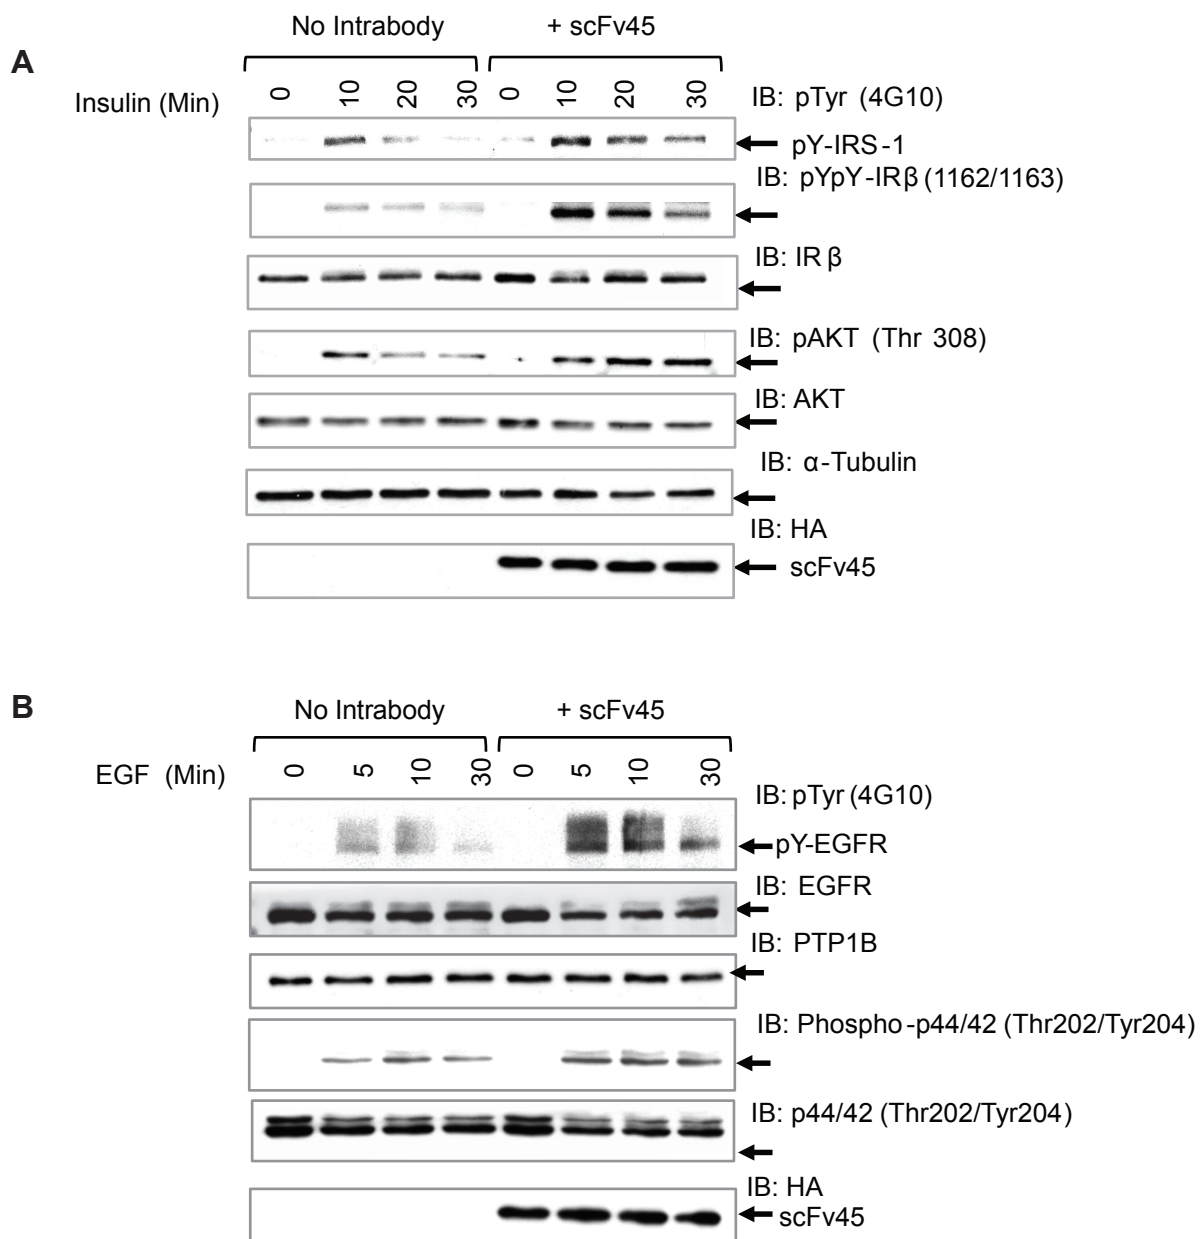

Supplement: NIHMS323062-supplement-01.pdf [file NIHMS323062-supplement-01.pdf]
